# Supplementary material for: Solubility enhancements through crystalline solid solutions, the non-linear Tammann diagram and the T–X phase diagram of salicylic acid–benzoic acid
Source: Royal Society of Chemistry journal article supplement (doi:10.1039/d3ce00152k), 2023-01-01
Supplement: d3ce00152k6.pdf [file d3ce00152k6.pdf]

Supporting information for *Solubility Enhancements through Crystalline Solid Solutions, Non-linear Tammann Diagram and T-X Phase Diagram of Salicylic acid - Benzoic acid*

Seyed Sepehr Mohajerani, Francesco Ricci and Fredrik L Nordstrom

Table 1. **DSC summary for SA-BA**

| X(BA)<br>mol<br>BA/mol<br>SA+BA | DSC<br>endotherms                    | Low temperature endotherm |                    |                   |                     |                  | High temperature endotherm |                    |                   |                     |                  |
|---------------------------------|--------------------------------------|---------------------------|--------------------|-------------------|---------------------|------------------|----------------------------|--------------------|-------------------|---------------------|------------------|
|                                 |                                      | T <sub>inset</sub>        | T <sub>onset</sub> | T <sub>peak</sub> | T <sub>offset</sub> | Enthalpy         | T <sub>inset</sub>         | T <sub>onset</sub> | T <sub>peak</sub> | T <sub>offset</sub> | Enthalpy         |
|                                 |                                      | °C                        | °C                 | °C                | °C                  | J/g              | °C                         | °C                 | °C                | °C                  | J/g              |
| 0                               | One endotherm                        |                           |                    |                   |                     |                  | 154.07<br>(0.08)           | 158.64<br>(0.006)  | 159.16<br>(0.09)  | 160.98<br>(0.23)    | 189.56<br>(4.21) |
| 0.0168                          | One endotherm                        |                           |                    |                   |                     |                  | 146.383<br>(1.6)           | 157.1<br>(0.4)     | 158.36<br>(0.15)  | 160.64<br>(0.21)    | 189.51<br>(0.28) |
| 0.0265                          | One endotherm                        |                           |                    |                   |                     |                  | 143.78<br>(0.81)           | 156.53<br>(0.24)   | 158.01<br>(0.22)  | 160.32<br>(0.248)   | 185.4<br>(3.37)  |
| 0.0490                          | One endotherm                        |                           |                    |                   |                     |                  | 137.42<br>(0.72)           | 153.61<br>(0.97)   | 156.4<br>(0.42)   | 158.95<br>(0.22)    | 172.01<br>(2.00) |
| 0.0598                          | Two separated endotherms             | 99.95<br>(3.30)           | 106.61<br>(2.81)   | 110.33<br>(0.79)  | 112.00<br>(0.26)    | (0.85)<br>(0.13) | 131.69<br>(1.06)           | 153.67<br>(1.15)   | 156.46<br>(0.43)  | 159.19<br>(0.22)    | 170.8<br>(5.86)  |
| 0.0682                          | Two separated endotherms             | 104.07<br>(1.74)          | 109.15<br>(0.63)   | 110.94<br>(0.08)  | 112.61<br>(0.24)    | 1.79<br>(0.08)   | 127.52<br>(1.17)           | 151.55<br>(0.43)   | 155.27<br>(0.14)  | 157.85<br>(0.10)    | 170.65<br>(3.89) |
| 0.0899                          | Two separated endotherms             | 104.85<br>(0.23)          | 109.87<br>(0.16)   | 110.91<br>(0.03)  | 112.46<br>(0.12)    | 4.3<br>(0.40)    | 123.04<br>(1.73)           | 149.99<br>(0.19)   | 154.21<br>(0.055) | 157.66<br>(0.41)    | 159.7<br>(4.46)  |
| 0.1014                          | Two separated endotherms             | 104.32<br>(1.05)          | 110.16<br>(0.04)   | 111.02<br>(0.04)  | 112.793<br>(0.09)   | 6.99<br>(1.19)   | 121.54<br>(2.04)           | 148.32<br>(2.12)   | 153.71<br>(0.79)  | 156.58<br>(1.05)    | 152.1<br>(4.99)  |
| 0.1228                          | Two separated endotherms             | 104.73<br>(0.39)          | 110.16<br>(0.04)   | 110.96<br>(0.05)  | 112.56<br>(0.19)    | 9.35<br>(0.50)   | 118.14<br>(2.2)            | 146.01<br>(1.58)   | 152.43<br>(0.46)  | 155.79<br>(0.49)    | 152.72<br>(1.98) |
| 0.1634                          | Two partially overlapping endotherms | 103.3<br>(0.75)           | 110.2<br>(0.08)    | 111.02<br>(0.005) | 112.70<br>(0.07)    | 16.48<br>(0.66)  |                            | 142.15<br>(1.460)  | 150.06<br>(0.70)  | 153.39<br>(0.260)   | 131.36<br>(8.69) |
| 0.2167                          | Two partially overlapping endotherms | 103.61<br>(0.83)          | 110.39<br>(0.05)   | 111.23<br>(0.06)  | 113.07<br>(0.17)    | 23.75<br>(0.92)  |                            | 137.52<br>(0.81)   | 147.43<br>(0.17)  | 150.75<br>(0.35)    | 119.31<br>(3.06) |
| 0.2734                          | Two partially overlapping endotherms | 102.52<br>(0.67)          | 110.46<br>(0.05)   | 111.25<br>(0.040) | 113.17<br>(0.190)   | 37.46<br>(3.86)  |                            | 131.95<br>(1.79)   | 142.1<br>(0.54)   | 147.24<br>(1.150)   | 101.41<br>(2.84) |
| 0.3090                          | Two partially overlapping endotherms | 103.11<br>(0.69)          | 110.37<br>(0.10)   | 111.51<br>(0.08)  | 113.38<br>(0.23)    | 50.07<br>(0.04)  |                            | 126.85<br>(1.61)   | 139.98<br>(0.50)  | 144.35<br>(0.33)    | 92.798<br>(1.67) |
| 0.3743                          | Two partially overlapping endotherms | 103.50<br>(0.33)          | 110.48<br>(0.03)   | 111.65<br>(0.27)  | 113.35<br>(0.26)    | 64.35<br>(3.28)  |                            | 123.39<br>(1.09)   | 134.61<br>(0.62)  | 140.86<br>(1.83)    | 80.03<br>(1.52)  |
| 0.4237                          | Two partially overlapping endotherms | 102.79<br>(0.77)          | 110.48<br>(0.01)   | 111.68<br>(0.22)  | 113.57<br>(0.23)    | 81.26<br>(2.75)  |                            | 120.39<br>(0.19)   | 129.48<br>(0.21)  | 136.39<br>(0.82)    | 63.45<br>(2.16)  |
| 0.4749                          | Two mostly overlapping endotherms    | 102.43<br>(0.63)          | 110.97<br>(0.32)   | 111.65<br>(0.14)  | 113.51<br>(0.02)    | 99.39<br>(3.23)  |                            |                    | 123.4<br>(0.15)   | 132.19<br>(0.06)    | 42.52<br>(1.18)  |

|        |                                      |                   |                  |                  |                  |                  |                  |                  |                  |                  |                  |
|--------|--------------------------------------|-------------------|------------------|------------------|------------------|------------------|------------------|------------------|------------------|------------------|------------------|
| 0.5479 | Two mostly overlapping endotherms    | 102.64<br>(0.24)  | 110.92<br>(0.23) | 111.64<br>(0.14) | 114.10<br>(0.32) | 126.61<br>(1.16) |                  |                  |                  | 124.68<br>(0.71) | 15.68<br>(1.17)  |
| 0.5856 | One endotherm                        | 102.66<br>(0.68)  | 111.40<br>(0.33) | 111.55<br>(0.09) | 116.93<br>(1.66) | 142.29<br>(2.10) |                  |                  |                  |                  |                  |
| 0.6632 | Two mostly overlapping endotherms    | 104.87<br>(0.84)  |                  |                  | 111.81<br>(0.11) | 78.847<br>(0.49) |                  | 111.58<br>(0.27) | 112.04<br>(0.19) | 115.11<br>(0.19) | 58.4<br>(0.12)   |
| 0.6980 | Two mostly overlapping endotherms    | 103.94<br>(0.73)  | 110.98<br>(0.43) | 111.94<br>(0.32) | 111.65<br>(0.14) | 55.23<br>(2.42)  |                  |                  |                  | 115.86<br>(0.03) | 81.08<br>(0.94)  |
| 0.7364 | Two mostly overlapping endotherms    | 103.74<br>(0.75)  | 110.08<br>(0.4)  | 112.48<br>(0.3)  | 111.66<br>(0.32) | 43.06<br>(7.42)  |                  |                  |                  | 117.09<br>(1.16) | 94.22<br>(4.8)   |
| 0.7730 | Two partially overlapping endotherms | 104.43<br>(2.05)  |                  | 111.44<br>(0.24) | 111.68<br>(0.24) | 17.6<br>(1.02)   |                  | 111.86<br>(0.28) | 114.21<br>(0.31) | 118.09<br>(1.31) | 118.97<br>(5.84) |
| 0.8113 | Two partially overlapping endotherms | 105.29<br>(0.12)  |                  | 111.2<br>(0.13)  | 111.74<br>(0.15) | 7.87<br>(0.73)   |                  | 113.1<br>(0.13)  | 115.45<br>(0.11) | 118.91<br>(0.18) | 128<br>(3.7)     |
| 0.8396 | Two partially overlapping endotherms | 105.72<br>(0.14)  |                  | 111.24<br>(0.10) | 111.83<br>(0.15) | 3.15<br>(0.10)   |                  | 114.28<br>(0.28) | 116.21<br>(0.19) | 119.78<br>(0.36) | 131.97<br>(0.10) |
| 0.8670 | Two partially overlapping endotherms | 106.875<br>(0.13) |                  | 112.32<br>(0.13) | 112.46<br>(0.08) | 2.09<br>(0.20)   |                  | 115.06<br>(0.33) | 117.05<br>(0.06) | 120.22<br>(0.43) | 136.82<br>(0.89) |
| 0.9053 | One endotherm                        |                   |                  |                  |                  |                  | 116.00<br>(0.63) | 117.3<br>(0.32)  | 118.52<br>(0.81) | 121.36<br>(0.76) | 138.84<br>(1.64) |
| 0.9239 | One endotherm                        |                   |                  |                  |                  |                  | 116.58<br>(0.10) | 117.9<br>(0.15)  | 118.93<br>(0.21) | 121.78<br>(0.09) | 140.38<br>(0.99) |
| 0.9412 | One endotherm                        |                   |                  |                  |                  |                  | 117.99<br>(0.77) | 119.32<br>(0.83) | 120.78<br>(0.74) | 123.43<br>(0.89) | 141.41<br>(1.21) |
| 0.9652 | One endotherm                        |                   |                  |                  |                  |                  | 119.12<br>(0.22) | 120.22<br>(0.36) | 121.41<br>(0.58) | 123.71<br>(0.35) | 142.61<br>(1.6)  |
| 0.9807 | One endotherm                        |                   |                  |                  |                  |                  | 120.06<br>(0.18) | 121.53<br>(0.41) | 122.62<br>(0.36) | 123.73<br>(0.22) | 144.71<br>(1.49) |
| 1      | One endotherm                        |                   |                  |                  |                  |                  | 121.2<br>(0.16)  | 122.2<br>(0.08)  | 123.15<br>(0.15) | 125.22<br>(0.13) | 147.10<br>(1.20) |

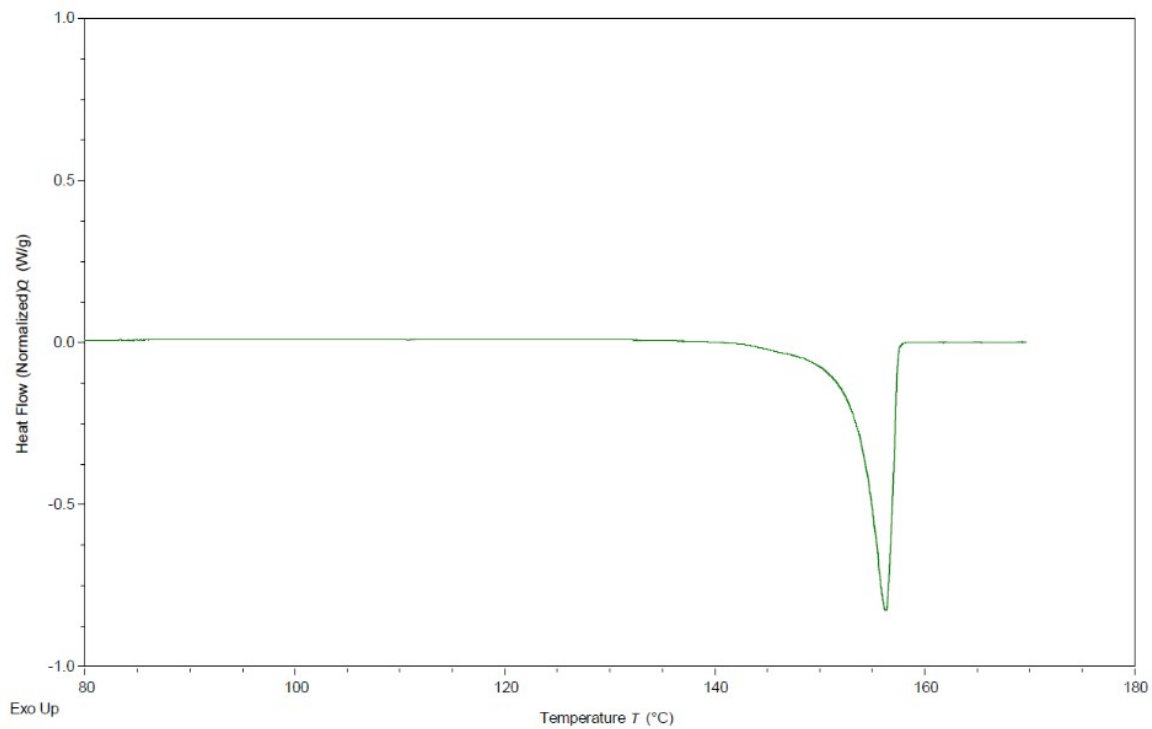

Figure 1. DSC at  $X(\text{BA}) = 0.0490$

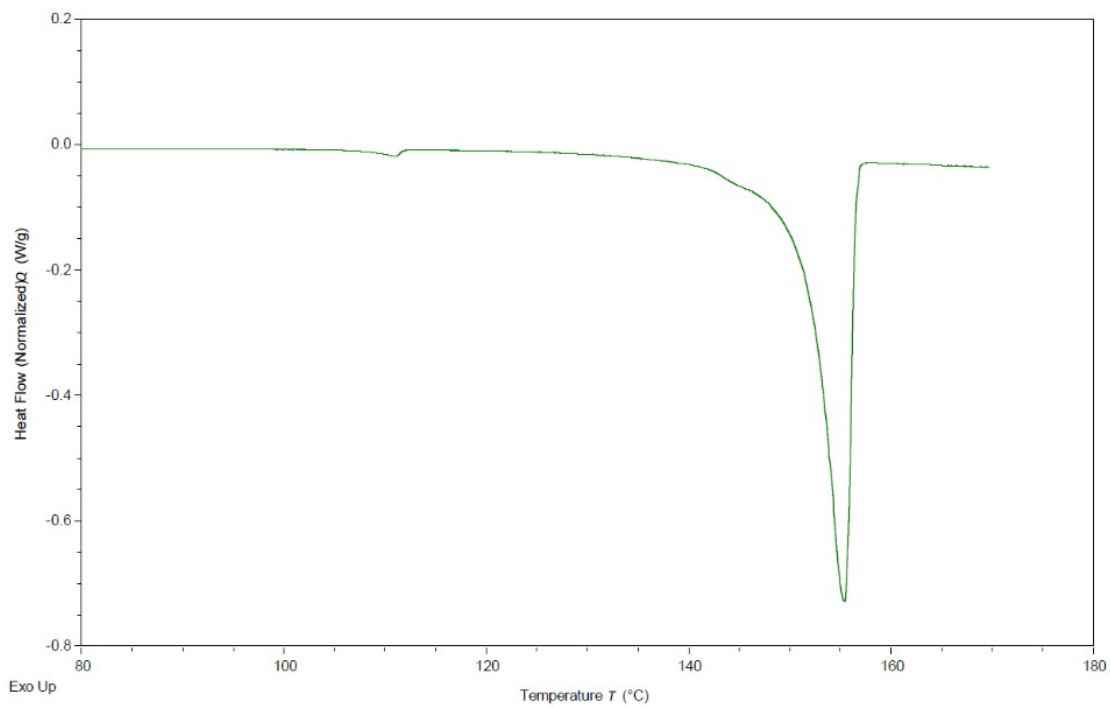

Figure 2. DSC at  $X(\text{BA}) = 0.0682$

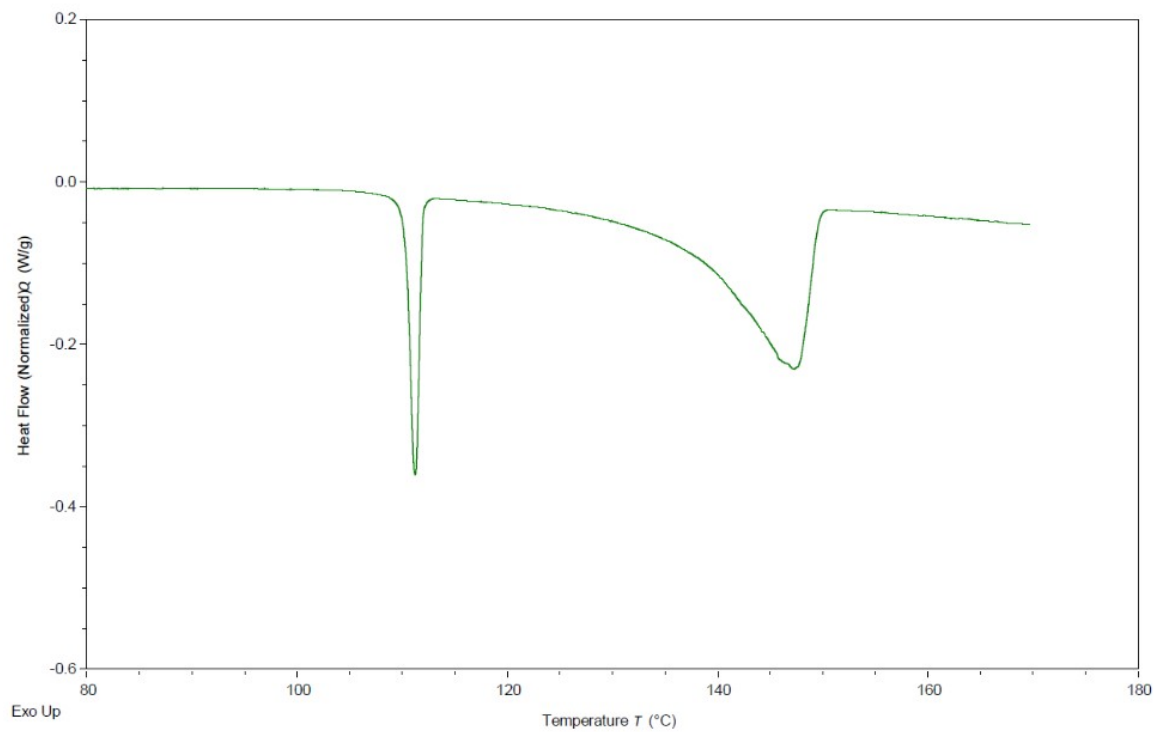

Figure 3. DSC at X(BA) = 0.2167

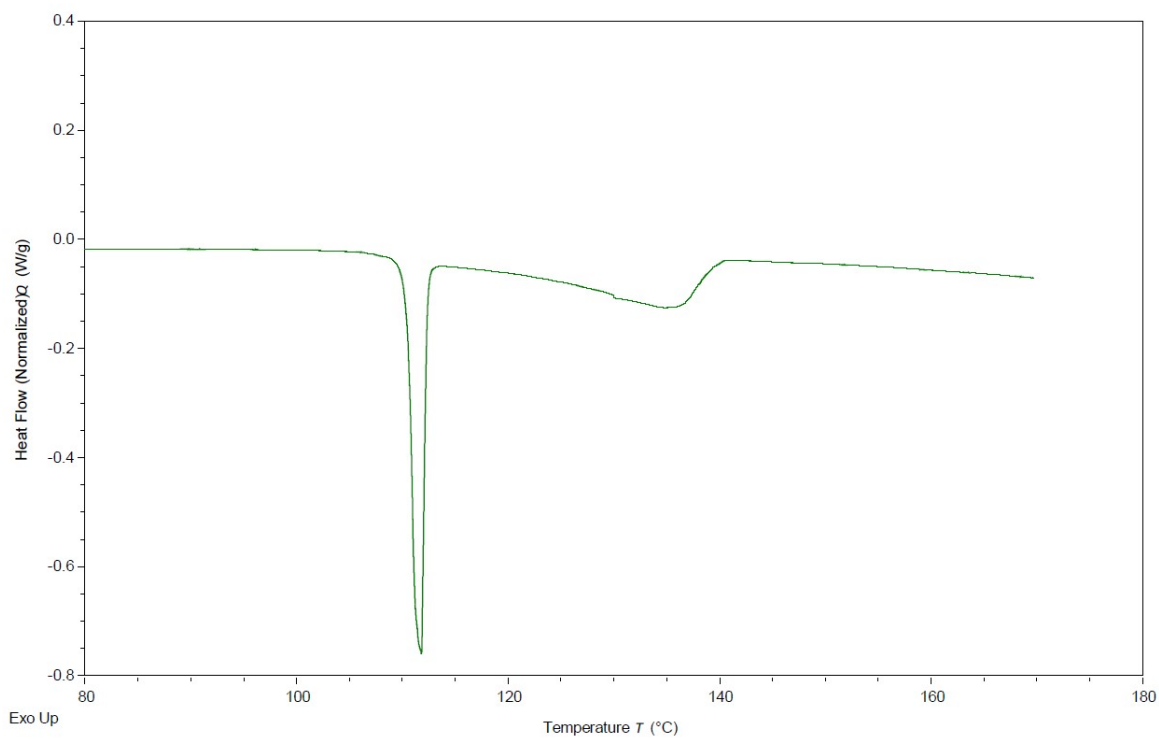

Figure 4. DSC at X(BA) = 0.3743

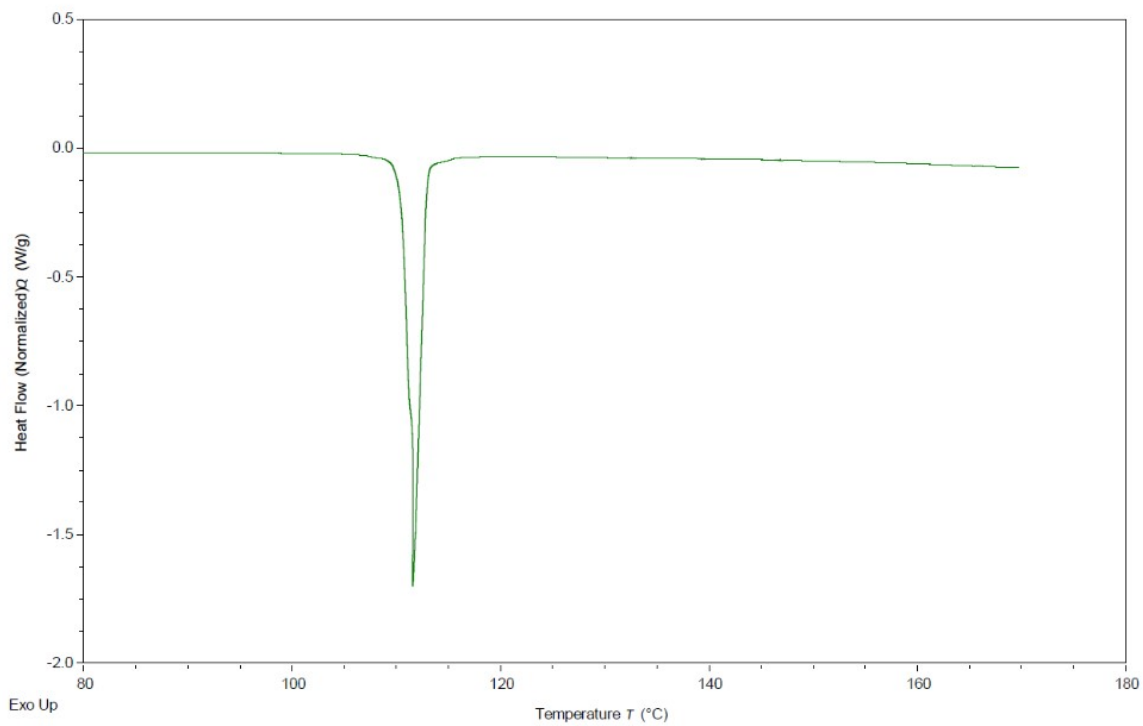

Figure 5. DSC at  $X(\text{BA}) = 0.5856$

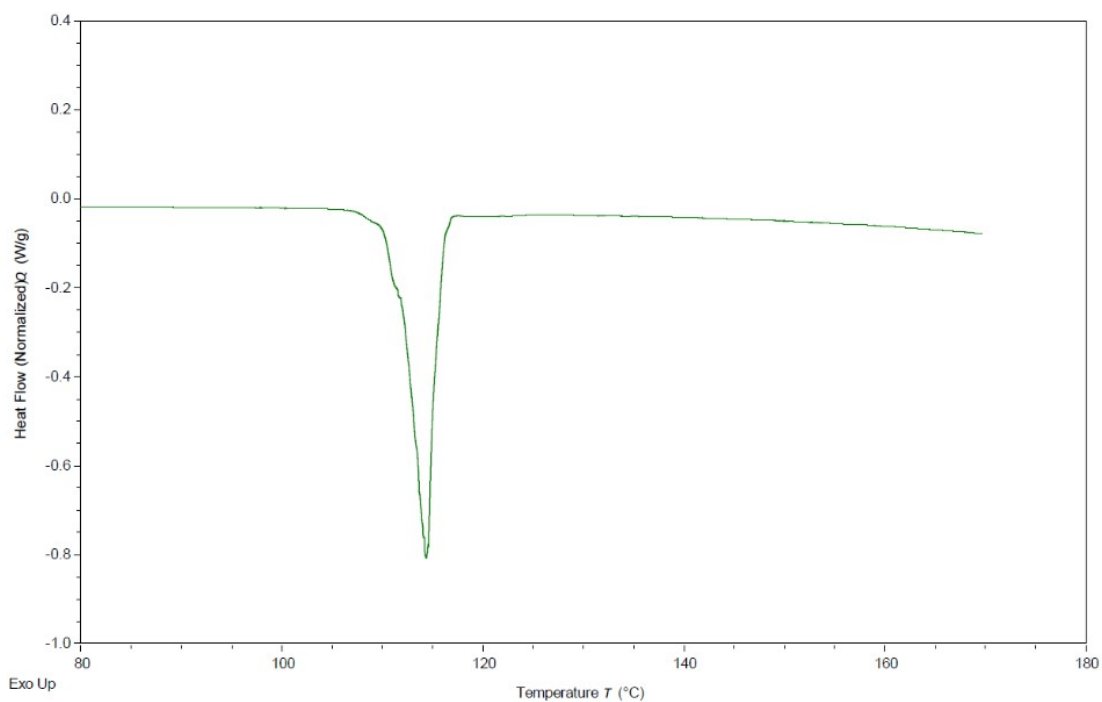

Figure 6. DSC at  $X(\text{BA}) = 0.7730$

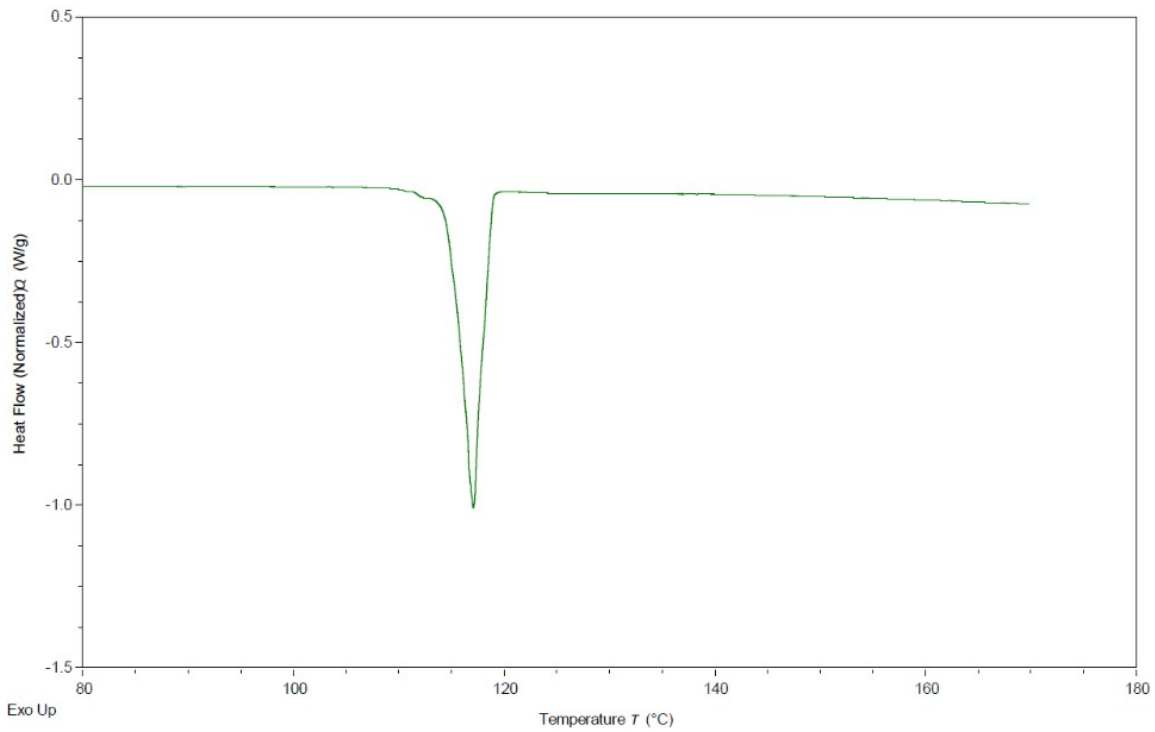

Figure 7. DSC at X(BA) = 0.8670

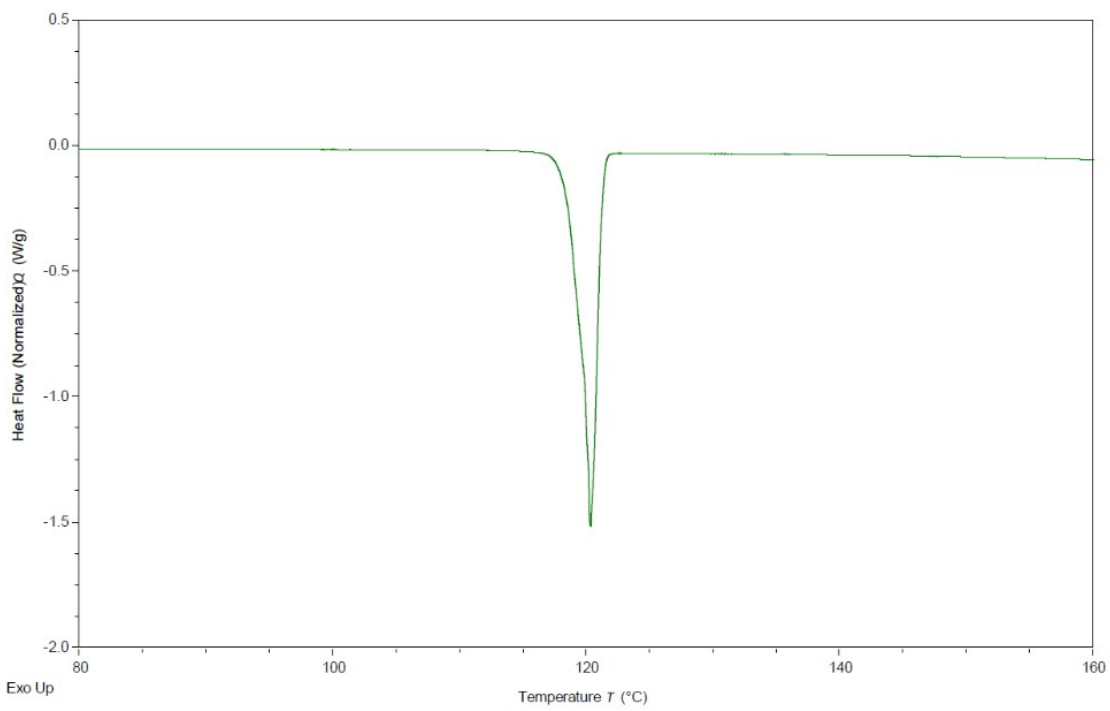

Figure 8. DSC at X(BA) = 0.9412

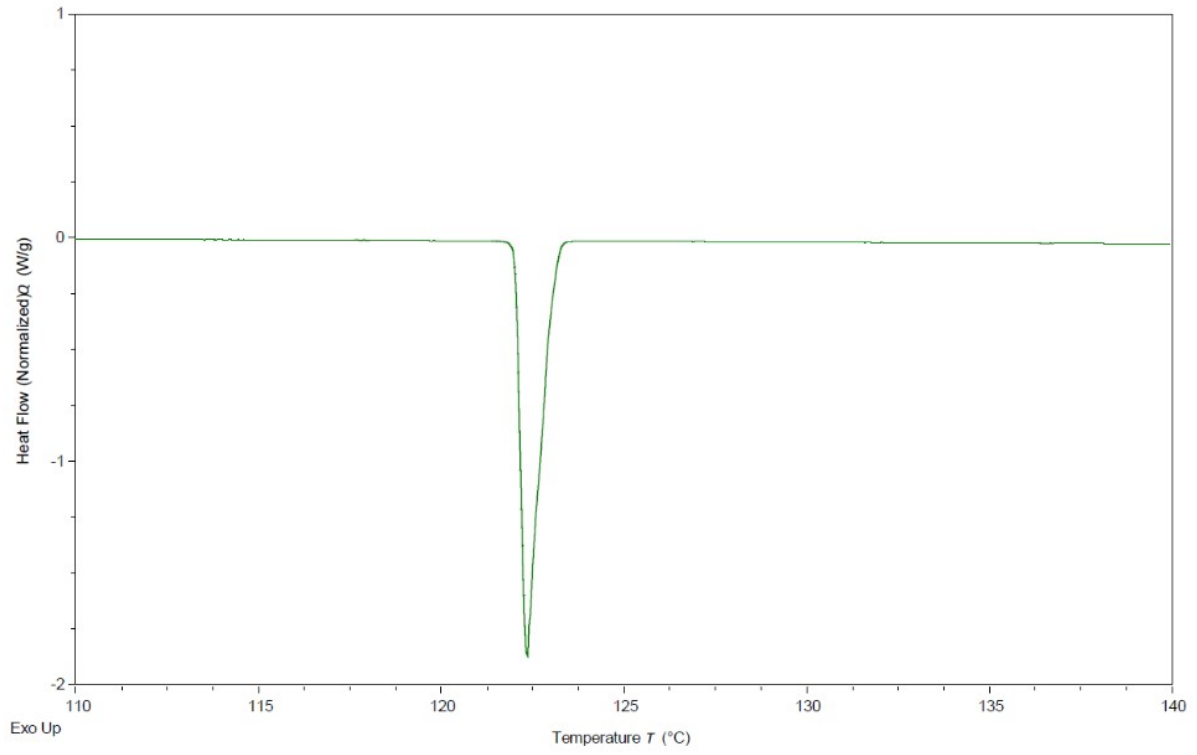

Figure 9. DSC at X(BA) = 1.000



Table 2. Solid-Liquid Equilibria (SLE) summary at 25°C

| Solid phase    | Liquid      | Solid       | Liquid        | Solid         | Conc. of SA     | Conc. of BA     | X(SA)               | X(BA)               | X(solvent)              |
|----------------|-------------|-------------|---------------|---------------|-----------------|-----------------|---------------------|---------------------|-------------------------|
|                | w% BA in SA | w% BA in SA | mol% BA in SA | mol% BA in SA | mg SA/g solvent | mg BA/g solvent | mmol SA/(mol total) | mmol BA/(mol total) | mol solvent/(mol total) |
| SA             | 0%          | 0%          | 0%            | 0%            | 23.37           | 0.00            | 3.6813              | 0.0000              | 0.99632                 |
| $\alpha$       | 3.97%       | 0.27%       | 4.47%         | 0.30%         | 24.88           | 1.03            | 3.9184              | 0.1834              | 0.99590                 |
| $\alpha$       | 5.05%       | 0.31%       | 5.67%         | 0.35%         | 24.46           | 1.30            | 3.8520              | 0.2315              | 0.99592                 |
| $\alpha$       | 10.54%      | 0.75%       | 11.75%        | 0.85%         | 25.36           | 2.99            | 3.9920              | 0.5318              | 0.99548                 |
| $\alpha$       | 11.91%      | 0.81%       | 13.26%        | 0.92%         | 26.49           | 3.58            | 4.1678              | 0.6372              | 0.99519                 |
| $\alpha$       | 17.30%      | 1.28%       | 19.13%        | 1.45%         | 25.81           | 5.40            | 4.0607              | 0.9609              | 0.99498                 |
| $\alpha$       | 16.54%      | 1.16%       | 18.32%        | 1.31%         | 26.13           | 5.18            | 4.1107              | 0.9217              | 0.99497                 |
| $\alpha$       | 17.96%      | 1.76%       | 19.84%        | 1.99%         | 27.23           | 5.96            | 4.2830              | 1.0602              | 0.99466                 |
| $\alpha$       | 26.12%      | 2.01%       | 28.56%        | 2.27%         | 26.87           | 9.50            | 4.2238              | 1.6889              | 0.99409                 |
| $\alpha$       | 23.98%      | 2.26%       | 26.30%        | 2.54%         | 27.08           | 8.54            | 4.2565              | 1.5188              | 0.99423                 |
| $\alpha$       | 31.79%      | 3.12%       | 34.52%        | 3.52%         | 28.21           | 13.15           | 4.4302              | 2.3358              | 0.99323                 |
| $\alpha$       | 35.69%      | 3.95%       | 38.56%        | 4.44%         | 32.13           | 17.83           | 5.0380              | 3.1625              | 0.99180                 |
| $\alpha$       | 34.29%      | 4.21%       | 37.11%        | 4.73%         | 32.91           | 17.17           | 5.1604              | 3.0456              | 0.99179                 |
| $\alpha$       | 44.74%      | 6.34%       | 47.80%        | 7.12%         | 36.11           | 29.23           | 5.6479              | 5.1714              | 0.98918                 |
| $\alpha$       | 46.23%      | 6.37%       | 49.30%        | 7.15%         | 36.98           | 31.80           | 5.7810              | 5.6221              | 0.98860                 |
| $\alpha$       | 46.40%      | 6.99%       | 49.48%        | 7.83%         | 37.54           | 32.50           | 5.8665              | 5.7447              | 0.98839                 |
| $\alpha$       | 47.90%      | 7.77%       | 50.98%        | 8.70%         | 38.72           | 35.60           | 6.0463              | 6.2880              | 0.98767                 |
| $\alpha+\beta$ | 52.99%      | 59.05%      | 56.05%        | 61.99%        | 44.02           | 49.63           | 6.8517              | 8.7364              | 0.98441                 |
| $\alpha+\beta$ | 53.64%      | 9.83%       | 56.69%        | 10.97%        | 42.78           | 49.50           | 6.6599              | 8.7163              | 0.98462                 |
| $\alpha+\beta$ | 53.52%      | 38.20%      | 56.57%        | 41.14%        | 44.73           | 51.50           | 6.9586              | 9.0625              | 0.98398                 |
| $\alpha+\beta$ | 53.70%      | 40.29%      | 56.75%        | 43.28%        | 43.65           | 50.63           | 6.7931              | 8.9117              | 0.98430                 |
| $\alpha+\beta$ | 54.36%      | 74.02%      | 57.39%        | 76.31%        | 42.75           | 50.92           | 6.6545              | 8.9637              | 0.98438                 |
| $\beta$        | 54.89%      | 83.02%      | 57.91%        | 84.69%        | 41.25           | 50.19           | 6.4235              | 8.8388              | 0.98474                 |
| $\beta$        | 58.97%      | 85.42%      | 61.91%        | 86.88%        | 33.88           | 48.70           | 5.2833              | 8.5885              | 0.98613                 |
| $\beta$        | 61.18%      | 86.40%      | 64.07%        | 87.79%        | 31.25           | 49.25           | 4.8735              | 8.6886              | 0.98644                 |
| $\beta$        | 65.94%      | 89.23%      | 68.65%        | 90.35%        | 24.38           | 47.21           | 3.8082              | 8.3394              | 0.98785                 |
| $\beta$        | 70.25%      | 91.51%      | 72.76%        | 92.42%        | 19.23           | 45.40           | 3.0069              | 8.0296              | 0.98896                 |
| $\beta$        | 79.22%      | 93.90%      | 81.17%        | 94.57%        | 11.60           | 44.23           | 1.8171              | 7.8334              | 0.99035                 |
| $\beta$        | 84.05%      | 96.23%      | 85.63%        | 96.65%        | 8.18            | 43.09           | 1.2816              | 7.6364              | 0.99108                 |
| $\beta$        | 87.15%      | 96.99%      | 88.47%        | 97.33%        | 6.33            | 42.90           | 0.9917              | 7.6061              | 0.99140                 |
| BA             | 100%        | 100%        | 100%          | 100%          | 0.00            | 42.40           | 0                   | 7.5256              | 0.99247                 |

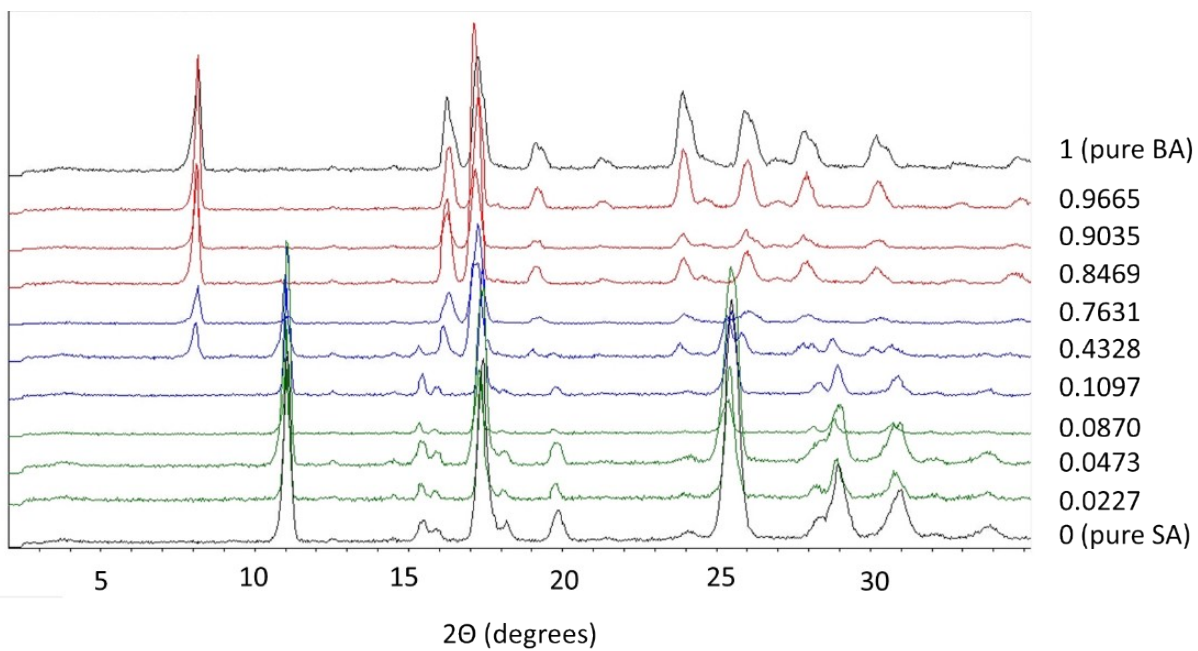

Figure 10. XRPD of solids from SLE study. The compositions are given in mole BA/mol (SA+BA). The color coding represents the solid phases, i.e. green denotes CSS phase  $\alpha$ , blue represents CSS  $\alpha$  and  $\beta$ , and red corresponds to CSS phase  $\beta$ .

Table 3. Determination of solvi at 25°C through SLE data using three approaches

| Solid solution phase | Method <sup>1</sup> | Regression curve | R <sup>2</sup> of regression | Invariant           | Solvus mol BA/(mol BA + SA) |
|----------------------|---------------------|------------------|------------------------------|---------------------|-----------------------------|
| $\alpha$             | A                   | Polynomial       | 0.9922                       | 0.5669 <sup>2</sup> | 0.109                       |
| $\alpha$             | B                   | Linear           | 0.9797                       | 43.58 <sup>3</sup>  | 0.113                       |
| $\alpha$             | C                   | Linear           | 0.9958                       | 50.43 <sup>4</sup>  | 0.124                       |
| $\beta$              | A                   | Polynomial       | 0.9963                       | 0.5669 <sup>2</sup> | 0.825                       |
| B                    | B                   | Linear           | 0.9726                       | 50.43 <sup>4</sup>  | 0.843                       |
| $\beta$              | C                   | Linear           | 0.9981                       | 43.58 <sup>3</sup>  | 0.831                       |

1. Method A: Regression of X(BA) data in solid vs liquid in region a or c to invariant point. Method B: Regression of solubility data of either BA or SA in region a or c to invariant point. Method C: Regression of concentration data of either BA or SA in region a or c to invariant point
2. Units in mol BA/(mol BA+SA)
3. Units in mg SA/g solvent
4. Units in mg BA/g solvent

**Methods B: Solubility of  $\alpha$  to the invariant point**

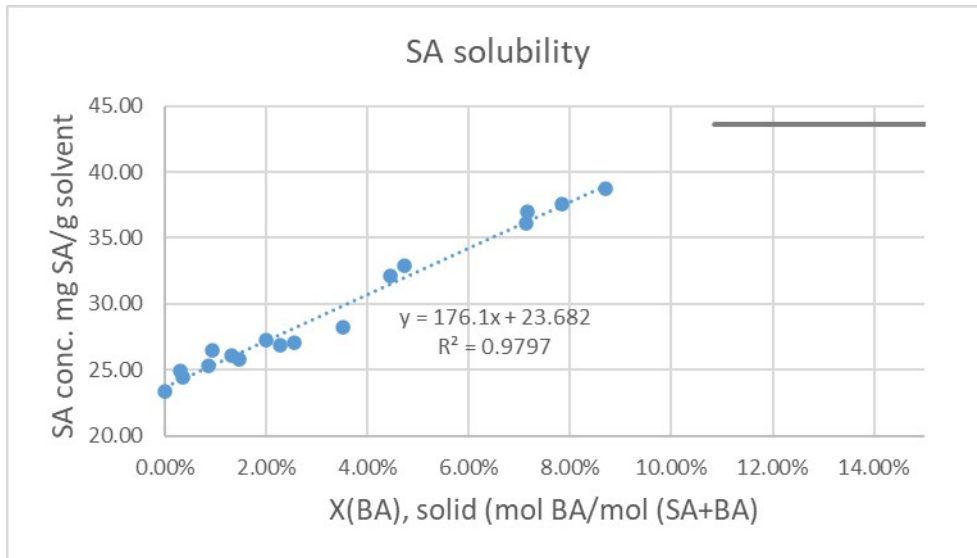

Figure 11. Solubility change of  $\alpha$  to invariant point. Linear regression of the solubility increase and extrapolation to the invariant point (method B) yields solvus of  $\alpha$ : X(BA) = 0.113

### Methods B: Solubility of $\beta$ to the invariant point

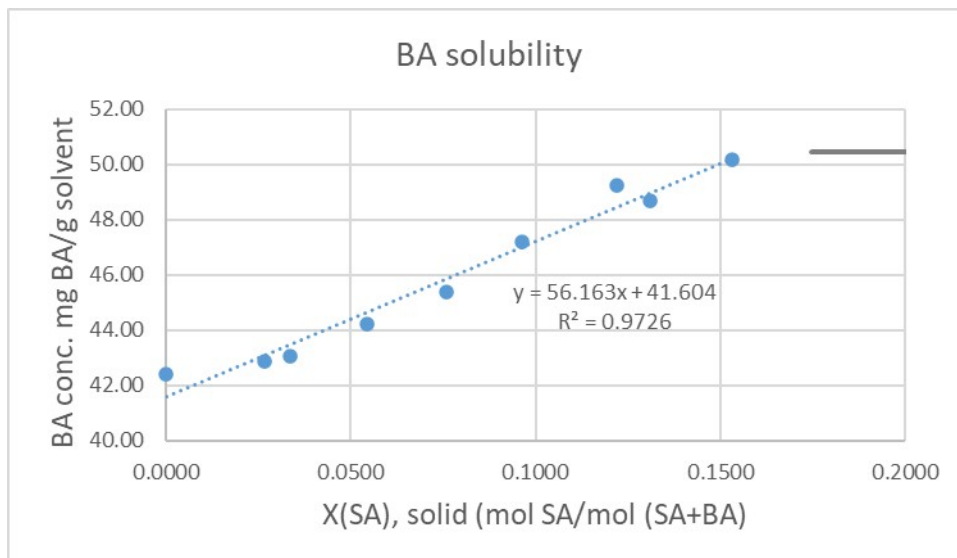

Figure 12. Solubility change of  $\beta$  to invariant point. Linear regression of the solubility increase and extrapolation to the invariant point (method B) yields solvus of  $\beta$ :  $X(\text{SA}) = 0.157$  or  $X(\text{BA}) = 0.843$

### Method C: Concentration of BA to the invariant point

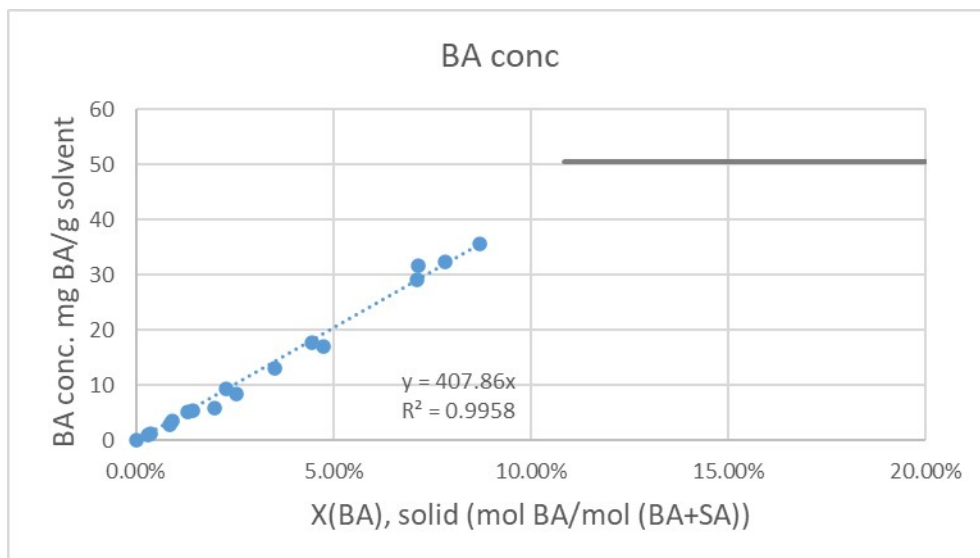

Figure 13. Concentration change of BA to the invariant point. Linear regression and extrapolation to the invariant point (method C) gives solvus for  $\alpha$ :  $X(\text{BA}) = 0.124$

**Method C: Concentration of SA to the invariant point**

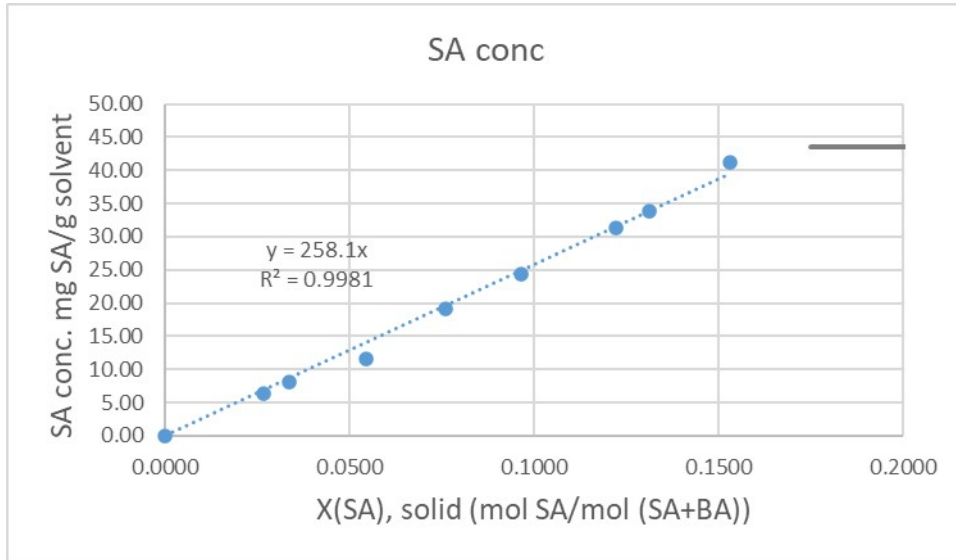

Figure 14. Concentration change of SA to the invariant point. Linear regression and extrapolation to the invariant point (method C) gives solvus of  $\alpha$ :  $X(\text{SA}) = 0.169$  or  $X(\text{BA}) = 0.831$
